# Supplementary material for: Comparison of the Amyloid Load in the Brains of Two Transgenic Alzheimer’s Disease Mouse Models Quantified by Florbetaben Positron Emission Tomography
Source: PubMed Central journal article supplement (PMC8520975; doi:10.3389/fnins.2021.699926), 2021-10-04
Supplement: Data_Sheet_1.pdf [file Data_Sheet_1.pdf]

## Supplementary material

### “Comparison of the Amyloid Load in the Brains of Two Transgenic Alzheimer’s Disease Mouse Models Quantified by Florbetaben Positron Emission Tomography”

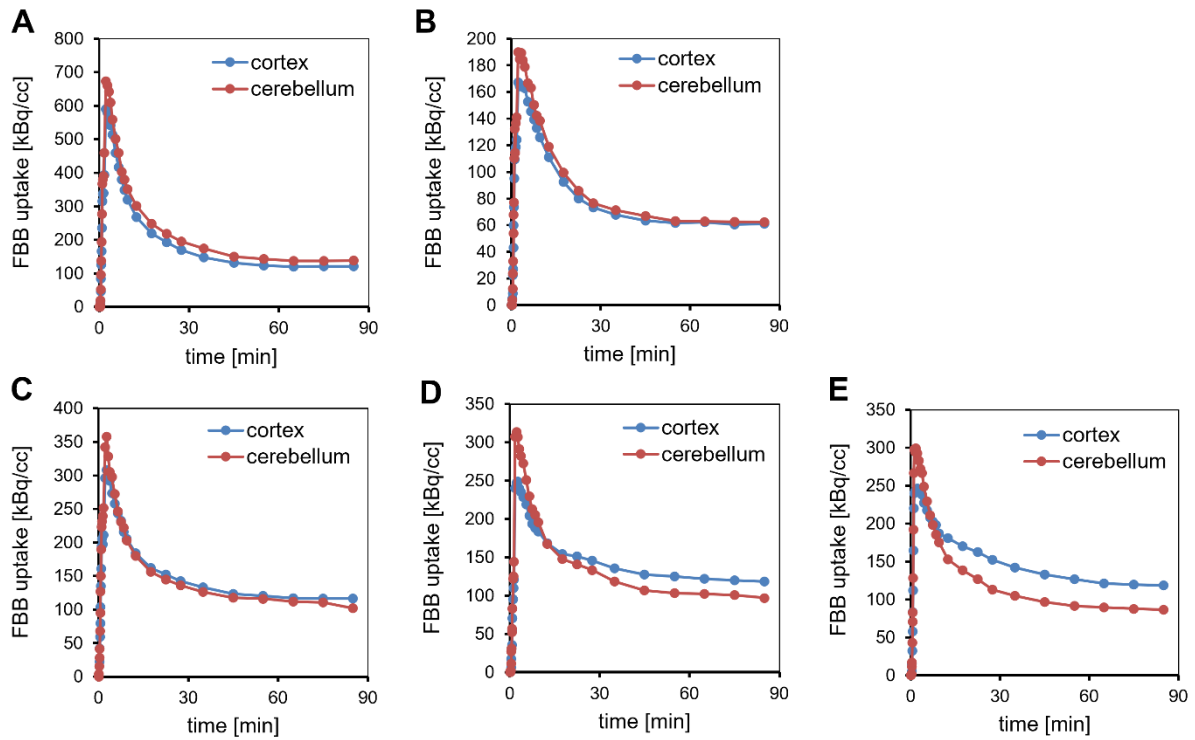

**Fig. S1.** Time activity curves of florbetaben retention in the brains of ARTE10 and APPswe/PS1dΔE9 mice.

Florbetaben (FBB) uptake and wash out in the brains of a representative wild-type mouse (A), a 24-month-old APPswe/PS1dΔE9 mouse (B), and homozygous ARTE10 mice at the age of 9 (C), 15 (D) or 21 months (E) is depicted as time activity curves in cortical and cerebellar regions of interest. The same animals as in fig. 1 are shown.
